# Supplementary material
Source: HighWire-hosted journal article supplement (https://gut.bmj.com/content/71/8/1577)

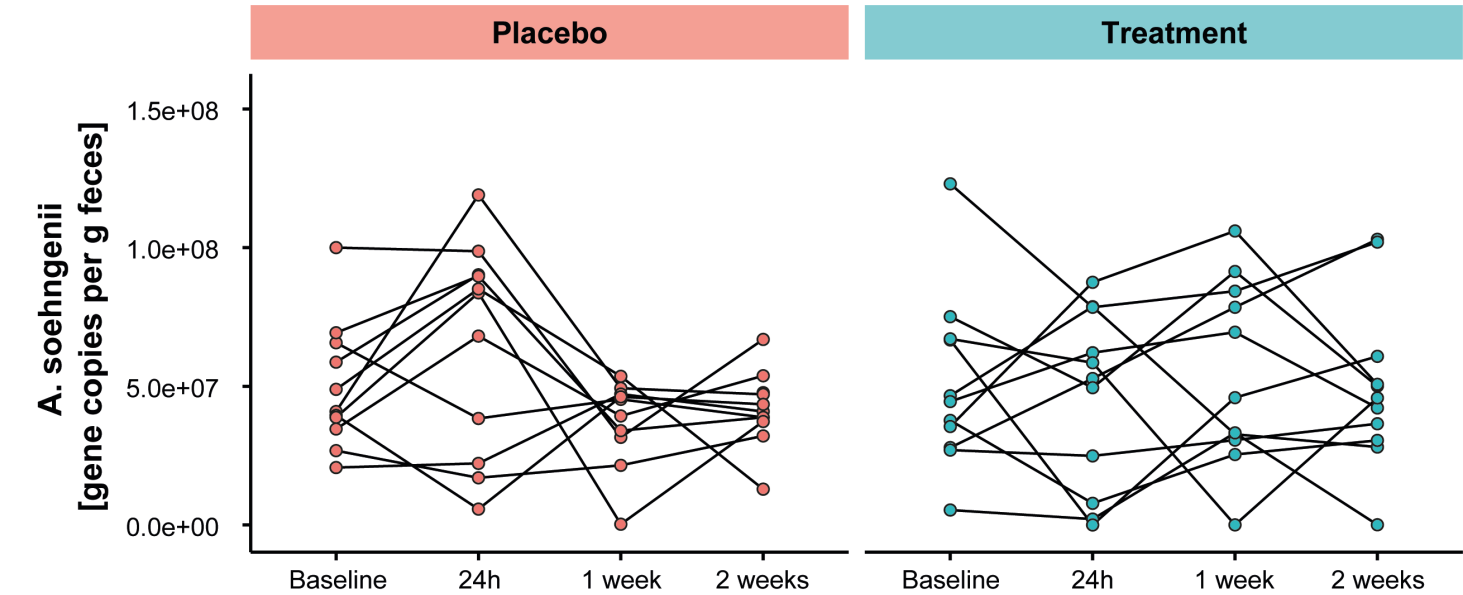

Supplement: inline-supplementary-material-2 [file inline-supplementary-material-2.pdf]
